## 21 **ABSTRACT**

22 The ongoing pandemic, COVID-19, caused by SARS-CoV-2 has taken the world, and especially  
23 the scientific community by storm. While vaccines are being introduced into the market, there is  
24 also a pressing need to find potential drugs and therapeutic modules. Remdesivir is one of the  
25 antivirals currently being used with a limited window of action. As more drugs are being vetted,  
26 passive immunotherapy in the form of neutralizing antibodies can provide immediate action to  
27 combat the increasing numbers of COVID-positive cases. Herein, we demonstrate that equines  
28 hyper-immunized with chemically inactivated SARS-CoV-2 generate high titers of antibody with  
29 a strong virus neutralizing potential. ELISA performed with pooled antisera displayed highest  
30 immunoglobulin titer on 42 days post- immunization, at 1:51,200 dilutions. F(ab')<sub>2</sub>  
31 immunoglobulin fragments generated from the pools also showed very high, antigen-specific  
32 affinity at 1:102,400 dilutions. Finally, *in vitro* virus neutralization assays confirmed that different  
33 pools of F(ab')<sub>2</sub> fragments could successfully neutralize SARS-CoV-2 with titers well above  
34 25,000, indicating the potential of this strategy in treating severe COVID-19 cases with high  
35 titers. The F(ab')<sub>2</sub> was able to cross neutralize another SARS-CoV-2 strain, demonstrating its  
36 efficacy against the emerging viral variants and the importance of this approach in our efforts of  
37 eradication of COVID-19. In conclusion, this study demonstrates that virus-neutralizing  
38 antibodies raised in equines can potentially be used as a treatment regimen in the form of  
39 effective passive immunotherapy to combat COVID-19.

## 40 **INTRODUCTION**

41 The ongoing pandemic COVID-19 caused by severe acute respiratory syndrome coronavirus-2  
42 (SARS-CoV-2) has caused over 115 million total infections with more than 2.5 million deaths  
43 globally to date<sup>1</sup>. The severity and the scale of the pandemic have imposed an unprecedented  
44 strain on human health and the global economy. Though several vaccines have been approved  
45 for immunization, it would require years of continuous vaccination drive before we defeat the

46 disease<sup>2,3</sup>. Remdesivir is an antiviral drug used for treating COVID-19, though with limited  
47 efficacy which can only shorten the period of hospitalization if administered at the early phase of  
48 infection<sup>4</sup>. The long delay in vaccination programs coupled with the absence of effective drug  
49 indicates that COVID-19 is far from being over<sup>5-7</sup>. The situation clearly calls for multiple  
50 approaches in countering the viral spread.

51 Neutralizing antibody (nAb)-based passive immunotherapy has been used as an antiviral  
52 therapy module against various intractable viral diseases<sup>8</sup> by blocking the viral attachment and  
53 entry into the host cell. In the pandemic setting, convalescent plasma from the recovered patient  
54 has been used as an emergency treatment plan for the emerging virus infectious diseases<sup>9</sup> and  
55 congruently, it has been approved by USFDA in the COVID-19 too<sup>10</sup>. While convalescent  
56 plasma is considered as a quick source of polyclonal nAb against the infectious agent, its scope  
57 is limited due to the lack of abundant blood source, heterogeneous antibody titer, and possible  
58 risks of transmission of blood-borne infections<sup>7,11</sup>. An alternative to convalescent plasma can be  
59 the antisera with improved efficacy obtained from hyper-immunized large animals such as  
60 equines as demonstrated against various infectious diseases and venoms<sup>12-14</sup>. Even though  
61 equine-derived antisera offer great potential for passive immunotherapy, they carry the risk of  
62 antibody-dependent enhancement of infection (ADE) and serum sickness<sup>15,16</sup>. To overcome this  
63 limitation, the next-generation passive immunotherapy uses the F(ab')<sub>2</sub> fragment of antigen-  
64 specific immunoglobulins, thus avoiding the risk of ADE by removing the Fc region of the  
65 antibody<sup>17-19</sup>.

66 Based on the above background, we have developed equine SARS-CoV-2 specific  
67 immunoglobulin fragment F(ab')<sub>2</sub> and evaluated its virus neutralization potential. In this process,  
68 the SARS-CoV-2 cultures of Indian isolate were propagated and chemically inactivated before  
69 immunizing equines for the evaluation of its immunogenicity and potency. The immunoglobulin  
70 fragments F(ab')<sub>2</sub> were prepared from the hyper-immunized equines and their virus  
71 neutralization potential was tested by microneutralization assay. The result of the study

72 indicates the efficacy of SARS-CoV-2 specific F(ab')<sub>2</sub> fragments in the neutralization of the virus.  
73 This strategy is reproducible, easily scalable and could be made available for the masses. This  
74 approach of immunotherapy will considerably help in managing the global COVID-19 pandemic  
75 scenario.

## 76 **MATERIALS AND METHODS**

77 **Cell Culture:** Vero (CCL-81) cells were cultured in Dulbecco's modified eagle medium (DMEM,  
78 Gibco) supplemented with 10% Fetal Bovine Serum (Hyclone) and 1 × Penicillin-Streptomycin  
79 cocktail (Gibco). Cells were continuously passaged at 70-80% confluency and were maintained  
80 in a humidified cell culture incubator at 37°C and 5% CO<sub>2</sub>.

81 **SARS-CoV-2 propagation, quantification, and infection:** SARS-CoV-2 virus was isolated  
82 from COVID-19 patient sample. Briefly, viral transport media (VTM) with lower Ct values (<20)  
83 for SARS-CoV-2 Envelop and RdRp genes by real-time qRT-PCR were identified for culturing.  
84 100µL of the filter-sterilized VTM was added to Vero cell monolayer in 96 well plates. Fresh  
85 media was supplemented three hrs post-infection (hpi) and the wells were observed daily for  
86 cytopathic effect (CPE). After the appearance of CPE, the supernatants of the corresponding  
87 wells were transferred to fresh monolayers of Vero cells and the culture was continued. The  
88 supernatants were regularly monitored by real-time qRT-PCR for viral genes as an indicator for  
89 viral replication. Two such isolates that established continuous replication were identified and  
90 sequenced by next-generation sequencing. Their genomic sequences have been deposited to  
91 the GISAID database <sup>20,21</sup> (GISAID ID: EPI\_ISL\_458075; virus ID- hCoV-19/India/TG-CCMB-  
92 O2-P1/2020, and EPI\_ISL\_458046; virus ID- hCoV-19/India/TG-CCMB-L1021/2020). These  
93 viral stocks were used for all the experiments in this study.

94 All viral cultures were maintained in serum-free media. Three days post-infection, the cell  
95 culture supernatant was collected, centrifuged at 5000 rpm for 10 min at 4°C to remove all the  
96 cell debris, and was stored at -80°C till further use. Infectious viral titers of the supernatants  
97 were measured by plaque forming assay (PFU/mL). All infections for the experimental assay

98 were performed in serum-free media for two hrs at 37°C with the required amount of virus  
99 calculated from the respective PFU values.

100 **Real-time Quantification and Plaque forming assay:** RNA was isolated using viral RNA  
101 isolation kit (MACHEREY-NAGEL GmbH & Co. KG). Real-time quantitative RT-PCR was  
102 performed in Roche LightCycler 480 either using a commercial kit (LabGun™ COVID-19 RT-  
103 PCR Kit; CV9032B) or following WHO guidelines using SuperScript™ III Platinum™ One-Step  
104 qRT-PCR Kit (Thermo Fisher) and TaqMan probes against SARS-CoV-2 E- and RdRp (Eurofins  
105 Scientific). Raw Ct values generated post analysis of qRT-PCR was used to score the  
106 supernatants. For plaque assay, 0.35 million Vero cells were seeded in 6 well plates and serial  
107 dilutions of virus supernatants ( $10^{-3}$  to  $10^{-8}$ ) were used for infection in serum-free media. Two hrs  
108 post-infection, cells were briefly washed with 1 × PBS to remove unbound virus and overlaid  
109 with 1 × agarose overlay media (2 × DMEM, 5% FBS, 1% penicillin-streptomycin, 2% LMA).  
110 Plates were left undisturbed at 37°C with 5% CO<sub>2</sub> in an incubator for 6-7 days. Later, 4%  
111 formaldehyde in 1 × PBS was added onto the overlay media for fixation and incubated for 15-20  
112 min at 37°C. The overlay media along with formaldehyde were removed, the cells were washed  
113 briefly with 1× PBS and then stained with crystal violet stain (1% crystal violet in ethanol was  
114 used as the stock solution and 0.1% working solution was prepared in double distilled water).  
115 The plates were washed, dried and the number of clear zones in the plate was counted to  
116 determine the infectious titer as PFU/mL.

117 **Virus Inactivation:** The cell culture supernatant containing SARS-CoV-2 was inactivated using  
118 beta propiolactone (BPL; HiMedia) at a ratio of 1:250 or 1:1000. After adding BPL to virus  
119 supernatants, the mixture was incubated at 4°C for 16 hrs with constant stirring, followed by  
120 four-hour incubation at 37°C to hydrolyze the remaining BPL in the solution. The inactivation of  
121 the virus was measured by plaque assay or CPE for three consecutive rounds. The absence of  
122 plaques or CPE in the lowest dilution confirmed the total inactivation. The BPL treated

123 supernatants were precipitated by ultracentrifugation and the antigenic integrity of the samples  
124 was confirmed by immunoblotting.

125 **Immunoblotting:** Infected cell lysates and virus supernatants were separated on SDS-PAGE  
126 gels to confirm the presence and integrity of viral proteins. All samples were lysed in a mild lysis  
127 buffer (Tris-Cl, NaCl, NP40; protease and phosphatase inhibitors) and Laemmli loading dye was  
128 added. Once the proteins were separated on the gels, they were transferred onto PVDF  
129 membranes for 2 hours and subsequently blocked in 5% BSA. Blots were probed with  
130 Nucleocapsid (1:8000) and Spike (1:2000) primary antibodies, and HRP-conjugated secondary  
131 antibodies. Image processing was performed using ImageJ<sup>22</sup>.

132 **Equine immunization plan:** Separate groups (lots) each comprising of equines were formed  
133 and each lot was assigned a unique lot number. These unique numbers were used across the  
134 entire study involving activities such as immunization, bleeding and plasmapheresis. The  
135 immunization schedule comprised of primary immunization, during which period the animals  
136 were sensitized with inactivated SARS-CoV-2 viral antigen mixed with Freund's complete  
137 adjuvant (FCA) as adjuvant and administered for a single time. The subsequent booster  
138 immunizations were administered with Freund's incomplete adjuvant (FIA).

139 During the primary immunization, the animals were immunized on days 0, 15, 29, 35 and 45.  
140 On day zero, the equines were immunized with 1mL of viral antigen suspension containing  $1 \times$   
141  $10^7$  inactivated virus particles mixed with equal volumes of FCA. The subsequent booster doses  
142 were prepared by mixing 0.5 mL of viral antigen (containing  $1 \times 10^7$  inactivated virus particles)  
143 with equal volume of FIA and administered periodically for boosting the immune response.  
144 Plasma samples from the immunized animals were tested periodically to estimate the antibody  
145 response against SARS-CoV-2 inactivated viral antigen. The highest dilutions of the plasma  
146 samples necessary to bind with specificity to viral antigen coated in the micro-titer plate were  
147 estimated by ELISA. Once the antibody response in the animals was saturated, they were bled  
148 and blood volumes equivalent to 1.5% of the individual body weight were collected in glass

149 containers containing acid citrate dextrose solution (final concentration of 15% in the blood  
150 volume) to prevent the coagulation. The supernatant plasma in each of the containers was  
151 carefully collected and pooled for further studies.

152 **Measurement of serum IgG level and their titer:** Antigen-specific total IgG was measured by  
153 indirect ELISA method. The whole viral antigen was coated in the 96 well plate (Nunc) using  
154 bicarbonate coating buffer (pH=9.5) overnight at 4°C. The coated plates were washed with  
155 washing buffer (0.05% Tween-20 in 1× PBS) and blocked with 4% skimmed milk solution for  
156 two hrs at RT followed by three rounds of washing. Sera from control and test group were  
157 added in the plate at 1:100 dilutions and incubated for two hrs at RT. Subsequently, the plate  
158 was washed four times and incubated with HRP conjugated anti-horse whole IgG secondary  
159 antibody (Sigma) for 1 hr at RT. After washing the plate five times, TMB substrate was added,  
160 the reaction continued for about three minutes, and stopped by addition of 0.2N H<sub>2</sub>SO<sub>4</sub>.  
161 Absorption maxima were recorded at 450nm and plotted on the XY axis graph.

162 In another set of experiment, IgG titer kinetics from 0 to 54 days post immunization were  
163 calculated by similar ELISA method with slight modification. Here, sera from ten animals for  
164 each time point were pooled in and serially diluted beginning from 1:100 to 1:204800 and added  
165 into viral antigen coated ELISA plates while rest of the steps were the same as above. Similar  
166 protocols were followed for the titration of F(ab')<sub>2</sub> fragments. Antibody titers were calculated by  
167 the reciprocal value of highest dilution at which absorbance value is ≥ twice the value of  
168 negative control in the same dilution series based on the earlier report<sup>23</sup>.

169 **Virus Neutralization assay:** Neutralization capacities of the antisera and F(ab')<sub>2</sub> were  
170 measured by microneutralization assay in 96-well plates. For the initial standardization of the  
171 optimal number of viruses required for CPE in 100% wells, cells were infected in a 96 well  
172 format with the varying numbers of the virus particles. In all our neutralization studies, 300 virus  
173 particles were used for infection. For neutralization of virus by equine antisera, 30000 cells were  
174 seeded in each well of a 96 well plate 12 hrs before assay set up. 25 µL of serum-free media

175 containing 300 infectious SARS-CoV-2 particles were mixed with 25 $\mu$ L of antiserum: serum-free  
176 media mix prepared separately. This mix contained antisera in 1:2, 1:4, 1:8 and up to 1:4096  
177 parts of concentrations. The antisera: virus mixes were pre-incubated at 37°C for 1 hr before  
178 infection. Subsequently, the wells containing cells were washed with 1 $\times$  PBS and the mixes  
179 were added to the corresponding wells. After the initial adsorption for 2 hrs at 37°C and 5%  
180 CO<sub>2</sub>, the virus containing media was replaced with fresh serum-sufficient media and incubated  
181 for six days. CPE developed in the wells were noted, media removed, and the remaining cells  
182 were fixed with 100 $\mu$ L of 4% formaldehyde at 37° C for 20 minutes. Post-fixation, formaldehyde  
183 was removed, wells were washed and the cells were stained with 0.1% trypan blue for 5  
184 minutes to detect the live cells. The wells were observed against white light and scored for the  
185 presence or absence of CPE and CCID 50 was calculated by a modified Reed and Muench  
186 formula. The proportionate distance (PD) was first calculated using the formula (% positive  
187 above 50%-50%)/(% positive above 50%- % positive below 50%). The PD obtained was  
188 multiplied by the dilution below 50% and value obtained was added to the dilution below 50% to  
189 reach the dilution of CCID50).

190 **Preparation of F(ab')<sub>2</sub> immunoglobulin:** Thirty liters of pooled plasma was subjected to  
191 enzymatic hydrolysis of IgG using pepsin (2% w/v) for 2 hrs with the pH adjusted to 3.3. The  
192 enzymatically treated plasma was subjected to complement inactivation by holding at a  
193 temperature of 56°C for 30 minutes. Further, caprylic acid was added gradually to make a final  
194 concentration of 5% v/v and mixed for one hour. Caprylic acid precipitates non-IgG proteins  
195 keeping the F(ab')<sub>2</sub> in solution. The antibody fragment F(ab')<sub>2</sub> in the supernatant was diafiltered  
196 and concentrated by ultra filtration through a 30 kDa cut-off membrane using 20 mM sodium  
197 acetate buffer with 0.9% sodium chloride. The resultant purified concentrated bulk becomes the  
198 key intermediate and tested for *in vitro* potency by ELISA and viral neutralization by the cell  
199 culture method. The concentrated bulk was formulated and filled as a final injectable dosage  
200 form, keeping the fill volume to 3 mL per vial. The finished product is intended for administration



201 through either intramuscular or intravenous route based on the severity of the viral load and the  
202 urgency of the intervention. Immunization schedule along with the workflow is given in Figure 1.

## 203 **RESULTS**

### 204 **Isolation of SARS-CoV-2 particles and establishment of virus culture**

205 Out of several cultures established, two cultures were used for this study. The cultures  
206 continued to demonstrate the presence of the virus in the supernatant as suggested by qRT-  
207 PCR (data not shown). Plaque forming assay revealed high titers of infectious virus particles in  
208 the order of  $10^7$  PFU/mL in these supernatants (data not shown). This culture was further  
209 expanded to larger size and stored for subsequent studies. To verify the presence of SARS-  
210 CoV-2, we analyzed the presence of virion proteins in the supernatants. Supernatants  
211 containing infectious viral particles were precipitated by ultracentrifugation, lysed, and  
212 subsequently subjected to immunoblotting. As demonstrated in Figure 2A, the spike (S) and  
213 nucleocapsid (N) proteins of SARS-CoV-2 were detected in the concentrated viral supernatants  
214 confirming the presence of the virus. In parallel, immunoblot analysis of SARS-CoV-2 infected  
215 Vero cells detected the robust expression of S and N proteins, further confirming the  
216 establishment of active SARS-CoV-2 cultures (Figure 2B). The viral genome sequences are  
217 available at GISAID (hCoV-19/India/TG-CCMB-O2-P1/2020 [hereafter referred to as CCMB-  
218 O2], GISAID accession- EPI\_ISL\_458075) and hCoV-19/India/TG-CCMB-L1021/2020 [referred  
219 to as CCMB-L-1021], GISAID accession- EPI\_ISL\_458046). We then examined the inactivation  
220 of the virus by  $\beta$ -propiolactone (BPL). We used either 1:250 or 1:1000 dilutions of BPL (v/v in  
221 media) in this study, both of which displayed total inactivation of the virus. Detection of viral  
222 proteins S and N confirmed the retention of the protein integrity of the inactivated viral stocks to  
223 induce immune response in the equines (Figure 2C).

### 224 **Antigen-specific immune response**

225 As explained in the Methods section, the horses were injected with inactivated SARS-CoV-2  
226 and blood samples were collected periodically. Plasma/sera prepared from individual animals

227 were subjected to ELISA to quantify IgG levels. Inactivated viral antigens induced strong IgG  
228 response from 29<sup>th</sup> day onwards peaking at 42 days after priming and subsequently stabilizing  
229 as shown in the Figure 3A. Notably, 80% of the immunized horses showed the seroconversion  
230 from 29<sup>th</sup> day onwards except two animals which remained non-responsive during the entire  
231 period of study (Figure 3B). The antibody titer which is indicative of quality of induced antibody  
232 also enhanced from 29<sup>th</sup> day (1: 25600 dilution) as compared to the negative control, peaking at  
233 42<sup>nd</sup> day post immunization (1:51200) and later retreating to 1: 25600 at 54<sup>th</sup> day as  
234 demonstrated in the Figures 4 A and B.

### 235 **Characterization of F(ab')<sub>2</sub> and measurement of their binding titer**

236 Pepsin treatment of the purified IgG-generated F(ab')<sub>2</sub> fragments and the purified F(ab')<sub>2</sub>  
237 fraction showed the characteristic peak in the chromatogram (Figure 5A) with a typical band  
238 visible around 110 kDa region in the non-reducing condition and 25 kDa in the reducing  
239 condition (Figure 5B), demonstrating the purity of F(ab')<sub>2</sub> preparation. In the non-reducing and  
240 reducing condition, F(ab')<sub>2</sub> typically shows single band at ~110kDa and 25 kDa position  
241 respectively whereas whole immunoglobulin shows a single band at 150 kDa in non-reducing  
242 condition and two bands at 75 kDa (heavy chain) and 25 kDa (light chain) positions under  
243 reducing condition. This result confirms that immunoglobulin has been successfully converted  
244 into F(ab')<sub>2</sub> fragments. Next, we measured the titer of the purified F(ab')<sub>2</sub>. The purified F(ab')<sub>2</sub>  
245 samples showed a remarkable titer of 1:102400 as compared to the negative control (Figure 6) .

### 246 **Neutralization of SARS-CoV-2 by antisera and purified F(ab')<sub>2</sub>**

247 Antisera from five individual animals were pooled and the virus neutralization capacity was  
248 quantified by microneutralization assay. Sera from days 29, 42 and 54 were identified for  
249 neutralization assay. The pooled sera were serially diluted at 1:2 ratio in serum-free media and  
250 each dilution sample was incubated with Vero cells for infection. As demonstrated in Figure 7A,  
251 the antisera from three independent time points displayed significantly higher neutralization

252 capacity over the control sera. Significant neutralization capacity was achieved 29 days post-  
253 immunization and spiked at 42 days post-immunization (Figure 7A).  
254 Next, we assayed the neutralization capacity of purified F(ab')<sub>2</sub> fragments from the antisera  
255 samples. Here, three separate F(ab')<sub>2</sub> pooled batches of antisera were assayed for  
256 neutralization. As demonstrated in Figure 7B the purified F(ab')<sub>2</sub> achieved significantly high  
257 neutralization titers well above 25000. We also tested the neutralization capacity against  
258 another strain CCMB-L-1021 that contained D614G mutation in its Spike protein. The antisera  
259 generated against CCMB-O2 demonstrated reasonably high neutralization titer against CCMB-  
260 L-1021 containing D614G, albeit lower than that against CCMB-O2, indicating the efficacy of  
261 polyclonal antisera against other variant strains of SARS-CoV-2 (Supplementary Figure 1).  
262 Cross neutralizing ability of antisera reduces the risk burden of its therapeutic relevance against  
263 emerging SARS-CoV-2 variants, thereby suggesting that the equines purified F(ab')<sub>2</sub> based  
264 passive immunotherapy hold enormous therapeutic potential against COVID19 in terms of cost,  
265 safety, storage and mass availability.

## 266 **DISCUSSION**

267 Emerging and re-emerging zoonotic viral infectious diseases such as SARS-CoV-2, SARS-CoV  
268 and MERS-CoV have become more frequent in the recent past due to the ever-increasing  
269 encounters with wild animals and pose great threat to public health system. Despite great  
270 advancement in the field of biotechnology and pharmaceuticals, effective response against such  
271 kind of pandemic is still lagging. Several vaccines have been at the threshold of being  
272 introduced into the markets and they are reported to be quite effective while some of them have  
273 been approved for emergency use <sup>3,24</sup>. Nevertheless, antibody therapy still holds important  
274 position in the fight against COVID-19 since vaccinating the entire human population would  
275 require years of continuous vaccination. Several monoclonal antibodies (mAbs) have shown  
276 their neutralization potential against SARS-CoV-2 <sup>25,26</sup>, but production of individual mAbs are  
277 resource-exhaustive and also bear the risk of losing their potential against the possible mutants

278 in the specific epitopes. Polyclonal antibodies generated in large animals such as equines have  
279 the advantage of faster generation, requirement of relatively much smaller investment and  
280 efficacy against multiple epitopes. Antisera generated from such sources had been a great  
281 source of antiviral antibody to treat the various viral infection such as SARS-CoV, Ebola, MERS-  
282 CoV and avian influenza virus<sup>27-30</sup>. Clinical evidence of COVID-19 disease shows that latent  
283 period of infection is short and majority of the patients recover faster without any persistent  
284 infection thus increasing the prospects of using neutralizing antibodies in blocking the SARS-  
285 CoV-2 virus particles<sup>31</sup>. Even though convalescent plasma from the recovered patients was  
286 considered to be a great source of neutralizing antibodies<sup>32</sup>, the difficulty in recruiting such  
287 individuals along with the lack of consistency in the neutralizing antibody titer among them has  
288 posed major obstacles in utilizing its potential<sup>33</sup>. Moreover, several reports indicate the lack of  
289 efficacy of convalescent plasma therapy in improving the severity of COVID-19<sup>34,35</sup>.  
290 Notwithstanding the use of plasma therapy to treat various infectious viral disease such as  
291 SARS, H5N1 and Ebola,<sup>28,36,37</sup> it always carries a risk of blood-borne infection and its limited  
292 availability hampers its prospect of universal application.

293 Considering the enormous potential of antibody based therapy, we developed a SARS-CoV-2  
294 specific immunoglobulin fragments F(ab')<sub>2</sub> in equines using chemically inactivated virus as  
295 similar to other reported work<sup>12,28</sup>. In the current study, we report the serum IgG titer to 1:51200  
296 at 42 days' post immunization, which is significant as compared to earlier report against the  
297 SARS-CoV<sup>28</sup>. Another study demonstrated the potency of virus like particle (VLP) of MERS-CoV  
298 in the equine<sup>27</sup> where they attained the antibody titer of 1: 20480. The higher antibody response  
299 in this study might be due to the optimum antigen dose and immunization schedule.

300 The immunoglobulin fragment is normally developed by the proteolytic cleavage of  
301 immunoglobulin that potentially negates the side effect of serum sickness and antibody  
302 dependent enhancement of infection (ADE) as it no more binds to the Fc receptor of the

303 immune cells. Hence, it is suitable for usage at larger doses without any off-target concerns<sup>38</sup>.  
304 F(ab')<sub>2</sub> that we generated achieved greater antigen specific antibody titer of 1: 102400 which is  
305 comparatively better than the earlier published reports<sup>27,28</sup>. Other recent reports also demonstrated  
306 high antibody titer for F(ab')<sub>2</sub> generated from horses using receptor binding domain (RBD) of  
307 spike protein<sup>18,19</sup>, but *in vivo* response still needs to be examined before any conclusion.  
308 Generation of inactivated virus was more direct and feasible approach for us than raising large  
309 amounts of vaccine quality spike proteins to be used at commercial levels. Apart from the lesser  
310 side effect, F(ab')<sub>2</sub> can penetrate deeper into the organs due to smaller size and lesser cellular  
311 affinity therefore it can neutralize the virus in the extravascular tissue<sup>39</sup>.  
312 Virus neutralization by an antibody is the major goal of antiviral passive immunotherapy as the  
313 effective antibody should neutralize the virus *in vitro* and *in vivo* setup at a significantly higher  
314 dilution. At this front, F(ab')<sub>2</sub> generated in this study demonstrates robust *in vitro* virus  
315 neutralization titer as high as 28000 which is comparable with other similar studies against the  
316 SARS-CoV-2<sup>18,19,28</sup>. Effective neutralization of a variant carrying mutation in spike protein by this  
317 antisera demonstrates the broad efficacy in using purified antisera of equine origin.  
318 Furthermore, the F(ab')<sub>2</sub> antibody shows very significant virus neutralization that is comparable  
319 or higher than that the convalescent plasma therapy offers without the risk of blood born  
320 disease<sup>40</sup>. The F(ab')<sub>2</sub> antibody developed from the whole virus antigen contains polyclonal  
321 antibody against all possible antigens exposed, having a broader range of binding repertoire  
322 thereby providing better anticipated scope of virus neutralization as compared to subunit  
323 polyclonal antibody or monoclonal antibody.  
324 The current study is based on the tested method for production of antigen specific antibody in  
325 equines and is easy to scale up by industry with the domain expertise. The WHO guidelines are  
326 already laid out for the production and application of antisera and their product from equine  
327 source therefore it can be quickly available to the world for immediate application<sup>41</sup>. Strain-  
328 specific antisera can be developed quickly based on the necessity. Hence F(ab')<sub>2</sub> antibody from

329 hyper-immunized equine serum could be a viable option for passive immunotherapy to treat the  
330 COVID-19 and along with vaccines, can collectively bring down the burden of the pandemic.  
331 Even in the optimistic scenario of active vaccines, passive immunotherapy can also be used to  
332 save the life of terminally ill patients as it has been used to treat rabies.

### 333 **Conclusion**

334 Anti-SARS-CoV-2 immunoglobulin F(ab')<sub>2</sub> prepared from the plasma of hyper-immunized  
335 equines demonstrated high antibody titers and effective neutralization of the parental as well  
336 emerging viral strains would be a reliable and efficient tool in the fight against COVID-19.

### 337 **Author Contributions**

338 D.G. optimized large-scale SARS-CoV-2 virus propagation, BPL inactivation and  
339 microneutralization assay. D.G., and D.K propagated, quantified and inactivated large-scale  
340 SARS-CoV-2 cultures, and performed microneutralization assays. D.V. and V.S established  
341 SARS-CoV-2 cultures used in this study. H.P. performed immunoblotting. N.K. conceived and  
342 conceptualized the study along with K.H.H. F.A. and R.K. performed the immunological  
343 characterization of anti-sera and F(ab')<sub>2</sub>. D. G., F.A., K.H.H. and N.K. wrote the manuscript.  
344 C.K., P.S., and S.K performed the equine immunization and F(ab')<sub>2</sub> preparation. S.R provided  
345 the patient sample for the isolation of SARS-CoV-2.

### 346 **Acknowledgement**

347 Several volunteers at the Centre for Cellular and Molecular Biology who were part of COVID-19  
348 testing are thanked for their help in identifying SARS-CoV-2 positive samples for virus culturing.  
349 Mohan Singh Moodu and Amit Kumar contributed significantly with the logistics. We thank  
350 Karthika Nair, Abhirami P S, and Sai Poojitha for their help with various experiments.

351

352

353

354 **Institutional ethics clearance**

355 Institutional ethics clearance (IEC-82/2020) was obtained for the patient sample processing for  
356 virus culture.

357 **Institutional biosafety**

358 Institutional biosafety clearance was obtained for the experiments pertaining to SARS-CoV-2.

359 **REFERENCES**

- 360 1. World Health Organization (WHO). WHO Coronavirus Disease (COVID-19) Dashboard. 5  
361 *november 2020*.
- 362 2. WHO. *Draft landscape of COVID-19 candidate vaccines-15 October 2020*. Who (2020).
- 363 3. Joffe, S. Evaluating SARS-CoV-2 Vaccines after Emergency Use Authorization or  
364 Licensing of Initial Candidate Vaccines. *JAMA - Journal of the American Medical*  
365 *Association* vol. 325 221–222 (2021).
- 366 4. Beigel, J. H. *et al*. Remdesivir for the Treatment of Covid-19 — Final Report. *N. Engl. J.*  
367 *Med.* (2020) doi:10.1056/nejmoa2007764.
- 368 5. Long, Q. X. *et al*. Clinical and immunological assessment of asymptomatic SARS-CoV-2  
369 infections. *Nat. Med.* (2020) doi:10.1038/s41591-020-0965-6.
- 370 6. Casadevall, A., Joyner, M. J. & Pirofski, L. A. SARS-CoV-2 viral load and antibody  
371 responses: The case for convalescent plasma therapy. *Journal of Clinical Investigation*  
372 (2020) doi:10.1172/JCI139760.
- 373 7. Yin, S. *et al*. Longitudinal anti-SARS-CoV-2 antibody profile and neutralization activity of  
374 a COVID-19 patient. *Journal of Infection* (2020) doi:10.1016/j.jinf.2020.06.076.
- 375 8. Salazar, G., Zhang, N., Fu, T. M. & An, Z. Antibody therapies for the prevention and  
376 treatment of viral infections. *npj Vaccines* (2017) doi:10.1038/s41541-017-0019-3.
- 377 9. Shen, C. *et al*. Treatment of 5 Critically Ill Patients with COVID-19 with Convalescent  
378 Plasma. *JAMA - J. Am. Med. Assoc.* (2020) doi:10.1001/jama.2020.4783.
- 379 10. Tanne, J. H. Covid-19: FDA approves use of convalescent plasma to treat critically ill  
380 patients. *BMJ* (2020) doi:10.1136/bmj.m1256.
- 381 11. Tiberghien, P. *et al*. Collecting and evaluating convalescent plasma for COVID-19  
382 treatment: why and how? *Vox Sanguinis* (2020) doi:10.1111/vox.12926.
- 383 12. Pan, X., Wu, Y., Wang, W., Zhang, L. & Xiao, G. Development of horse neutralizing  
384 immunoglobulin and immunoglobulin fragments against Junín virus. *Antiviral Res.* (2020)  
385 doi:10.1016/j.antiviral.2019.104666.
- 386 13. Wang, H. *et al*. Equine-Origin Immunoglobulin Fragments Protect Nonhuman Primates  
387 from Ebola Virus Disease. *J. Virol.* (2018) doi:10.1128/jvi.01548-18.
- 388 14. Ratanabanangkoon, K. *et al*. A Simple and Novel Strategy for the Production of a Pan-  
389 specific Antiserum against Elapid Snakes of Asia. *PLoS Negl. Trop. Dis.* (2016)  
390 doi:10.1371/journal.pntd.0004565.
- 391 15. Black, R. E. & Gunn, R. A. Hypersensitivity reactions associated with botulinal antitoxin.  
392 *Am. J. Med.* (1980) doi:10.1016/0002-9343(80)90469-6.
- 393 16. Luo, F. *et al*. Evaluation of Antibody-Dependent Enhancement of SARS-CoV Infection in  
394 Rhesus Macaques Immunized with an Inactivated SARS-CoV Vaccine. *Virologica Sinica*  
395 (2018) doi:10.1007/s12250-018-0009-2.

- 396 17. Arvin, A. M. *et al.* A perspective on potential antibody-dependent enhancement of SARS-  
397 CoV-2. *Nature* (2020) doi:10.1038/s41586-020-2538-8.
- 398 18. Cunha, L. E. R. *et al.* Equine hyperimmune globulin raised against the SARS-CoV-2  
399 spike glycoprotein has extremely high neutralizing titers. *bioRxiv* (2020).
- 400 19. Pan, X. *et al.* Immunoglobulin fragment F(ab')<sub>2</sub> against RBD potently neutralizes SARS-  
401 CoV-2 in vitro. *Antiviral Res.* (2020) doi:10.1016/j.antiviral.2020.104868.
- 402 20. Banu, S. *et al.* A distinct phylogenetic cluster of Indian SARS-CoV-2 isolates. *Open*  
403 *Forum Infect. Dis.* (2020) doi:10.1093/ofid/ofaa434.
- 404 21. Shu, Y. & McCauley, J. GISAID: Global initiative on sharing all influenza data – from  
405 vision to reality. *Eurosurveillance* (2017) doi:10.2807/1560-7917.ES.2017.22.13.30494.
- 406 22. Schneider, C. A., Rasband, W. S. & Eliceiri, K. W. NIH Image to ImageJ: 25 years of  
407 image analysis. *Nature Methods* vol. 9 671–675 (2012).
- 408 23. Frey, A., Di Canzio, J. & Zurakowski, D. A statistically defined endpoint titer determination  
409 method for immunoassays. *J. Immunol. Methods* (1998) doi:10.1016/S0022-  
410 1759(98)00170-7.
- 411 24. Polack, F. P. *et al.* Safety and Efficacy of the BNT162b2 mRNA Covid-19 Vaccine. *N.*  
412 *Engl. J. Med.* **383**, 2603–2615 (2020).
- 413 25. Rogers, T. F. *et al.* Isolation of potent SARS-CoV-2 neutralizing antibodies and protection  
414 from disease in a small animal model. *Science* (80-. ). **369**, 956–963 (2020).
- 415 26. Wan, J. *et al.* Human-IgG-Neutralizing Monoclonal Antibodies Block the SARS-CoV-2  
416 Infection. *Cell Rep.* **32**, 107918 (2020).
- 417 27. Zhao, Y. *et al.* Passive immunotherapy for Middle East Respiratory Syndrome  
418 coronavirus infection with equine immunoglobulin or immunoglobulin fragments in a  
419 mouse model. *Antiviral Res.* (2017) doi:10.1016/j.antiviral.2016.11.016.
- 420 28. Lu, J. H. *et al.* Preparation and development of equine hyperimmune globulin F(ab')<sub>2</sub>  
421 against severe acute respiratory syndrome coronavirus. *Acta Pharmacol. Sin.* (2005)  
422 doi:10.1111/j.1745-7254.2005.00210.x.
- 423 29. Pyankov, O. V. *et al.* Successful post-exposure prophylaxis of Ebola infected non-human  
424 primates using Ebola glycoprotein-specific equine IgG. *Sci. Rep.* (2017)  
425 doi:10.1038/srep41537.
- 426 30. Bal, C. *et al.* Safety, potential efficacy, and pharmacokinetics of specific polyclonal  
427 immunoglobulin F(ab')<sub>2</sub> fragments against avian influenza A (H5N1) in healthy  
428 volunteers: A single-centre, randomised, double-blind, placebo-controlled, phase 1 study.  
429 *Lancet Infect. Dis.* (2015) doi:10.1016/S1473-3099(14)71072-2.
- 430 31. Lauer, S. A. *et al.* The incubation period of coronavirus disease 2019 (CoVID-19) from  
431 publicly reported confirmed cases: Estimation and application. *Ann. Intern. Med.* (2020)  
432 doi:10.7326/M20-0504.
- 433 32. Rojas, M. *et al.* Convalescent plasma in Covid-19: Possible mechanisms of action.  
434 *Autoimmunity Reviews* (2020) doi:10.1016/j.autrev.2020.102554.
- 435 33. Liu, S. T. H. *et al.* Convalescent plasma treatment of severe COVID-19: a propensity  
436 score-matched control study. *Nat. Med.* (2020) doi:10.1038/s41591-020-1088-9.
- 437 34. Agarwal, A. *et al.* Convalescent plasma in the management of moderate covid-19 in  
438 adults in India: Open label phase II multicentre randomised controlled trial (PLACID Trial).  
439 *BMJ* **371**, (2020).
- 440 35. Simonovich, V. A. *et al.* A Randomized Trial of Convalescent Plasma in Covid-19 Severe  
441 Pneumonia. *N. Engl. J. Med.* NEJMoa2031304 (2020) doi:10.1056/NEJMoa2031304.
- 442 36. Rockman, S. *et al.* Intravenous Immunoglobulin Protects Against Severe Pandemic  
443 Influenza Infection. *EBioMedicine* (2017) doi:10.1016/j.ebiom.2017.04.010.
- 444 37. Kraft, C. S. *et al.* The Use of TKM-100802 and Convalescent Plasma in 2 Patients with  
445 Ebola Virus Disease in the United States. *Clin. Infect. Dis.* (2015) doi:10.1093/cid/civ334.
- 446 38. Hohdatsu, T., Nakamura, M., Ishizuka, Y., Yamada, H. & Koyama, H. A study on the



- 447 mechanism of antibody-dependent enhancement of feline infectious peritonitis virus  
448 infection in feline macrophages by monoclonal antibodies. *Arch. Virol.* (1991)  
449 doi:10.1007/BF01310476.
- 450 39. Laustsen, A. H. *et al.* Pros and cons of different therapeutic antibody formats for  
451 recombinant antivenom development. *Toxicon* (2018) doi:10.1016/j.toxicon.2018.03.004.
- 452 40. Wendel, S. *et al.* Screening for SARS-CoV-2 antibodies in convalescent plasma in Brazil:  
453 Preliminary lessons from a voluntary convalescent donor program. *Transfusion* (2020)  
454 doi:10.1111/trf.16065.
- 455 41. World Health Organization (WHO). Guidelines for the production, control and regulation  
456 of snake antivenom immunoglobulins. *Biol. Aujourdhui.* (2010).
- 457  
458

459

460

461

462

463

464

465

466

467

468

469

470

471

472

473

474

475

476

477

478 **Figure 1**

479

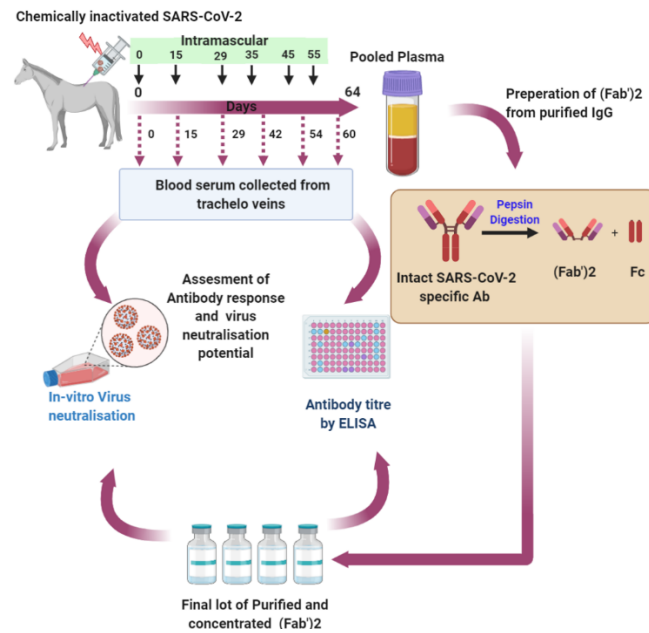

480

481 **Fig.1.** Immunization scheme and workflow. BPL-inactivated SARS-CoV-2 particles were  
482 mixed with FCA and injected intramuscularly into the equines. Immunization was repeated on  
483 the days mentioned in the scheme. Plasma collected from the immunized animals were pooled,  
484 their antibody response was assayed and virus neutralization titer was quantified by  
485 microneutralization assay. Subsequently, IgG was purified from the pooled plasma, digested  
486 with pepsin and the F(ab')<sub>2</sub> fragment was purified. Neutralization titers of these purified and  
487 concentrated fragments were also assayed.

488

489

490

491

492

493

494

495 **Figure 2**

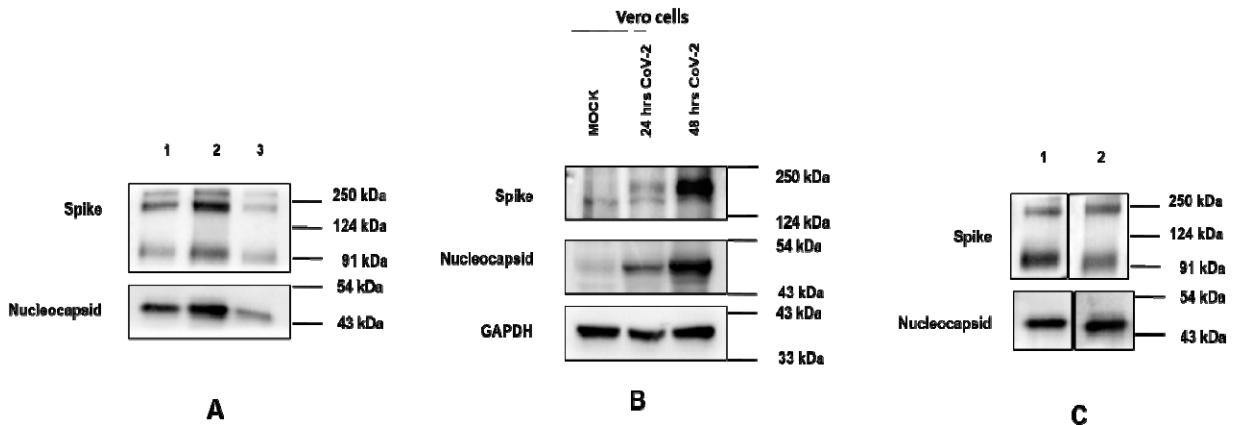

496

497 **Fig.2.** Characterization of SARS-CoV-2 isolate supernatant and *in vitro* infection. (A)  
498 Immunoblotting of SARS-CoV-2 spike and nucleocapsid proteins in three independent  
499 supernatants from *in vitro* cultures of Vero cells. Briefly, Vero cells were infected with SARS-  
500 CoV-2 stocks at 1:10 dilution and three days later supernatants were collected. 10 mL of three  
501 independent supernatants were ultra-centrifuged at 100000 × g for 90 minutes and the pellets  
502 were re-suspended in 1 mL of PBS, lysed with 2 × lysis buffer, and immunoblotted. Results from  
503 three independent supernatants are depicted. (B) Expression of spike and nucleocapsid  
504 proteins in Vero cells infected with SARS-CoV-2. The cells were harvested either at 24 or 48 hrs  
505 post-infection before subjecting to immunoblotting. (C) Detection of spike and nucleocapsid in  
506 BPL-treated viral supernatants. The supernatants were precipitated as in (2A) after the  
507 inactivation with BPL. Two individual samples were processed for immunoblotting.

508

509

510

511

512

513

514 **Figure 3**

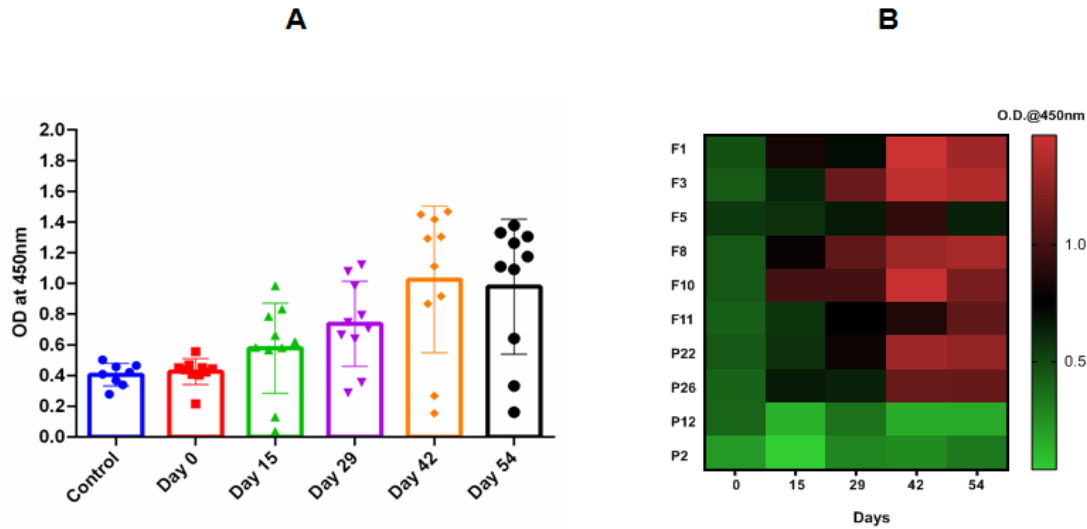

515

516

517

518 **Fig.3.** Evaluation of SARS-CoV-2 specific total IgG from serum collected at specified time  
519 points after first immunization using indirect ELISA. A) Antigen response kinetics of 10 individual  
520 horses along the course of time (Day 0 to day 54) with respect to control (pre-immunized sera).  
521 B) Heat map of the same with labeled individual animal.

522

523

524

525

526

527

528

529

530

531

532 **Figure 4**

533

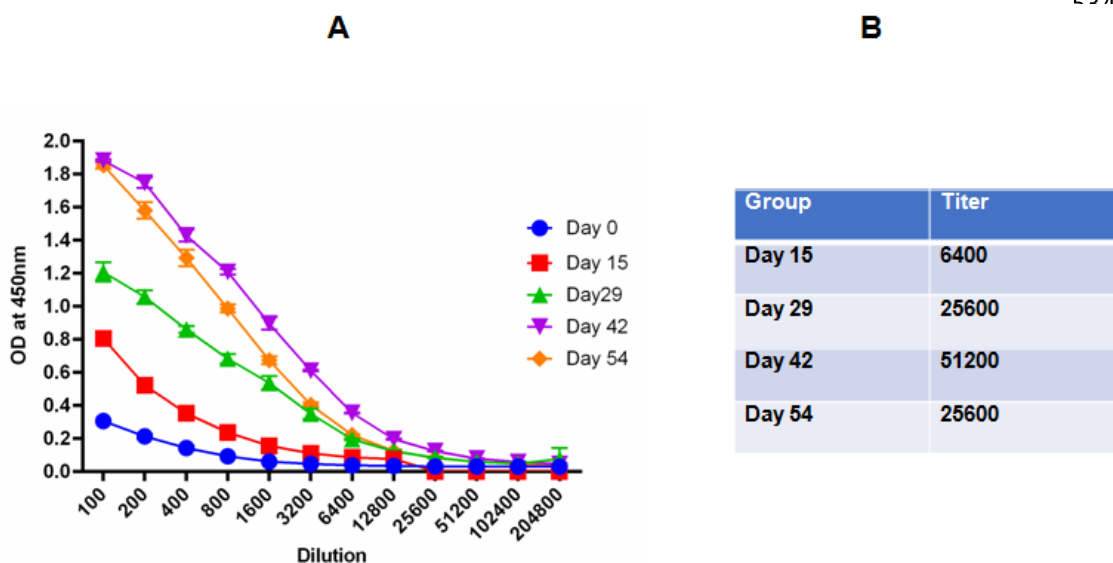

535 **Fig.4.** Antibody titration kinetics of serum collected along the different time points using indirect  
536 ELISA. A) Serially diluted serum (100 to 204800) used over the virus antigen coated ELISA  
537 plate and absorbance value at each dilution and time points represented at Y axis. B) Antibody  
538 titers were calculated by the reciprocal value of highest dilution at which absorbance value is  $\geq$   
539 twice the value of negative control in the same dilution series.

540

541

542

543

544

545

546

547

548

549

550 **Figure 5**

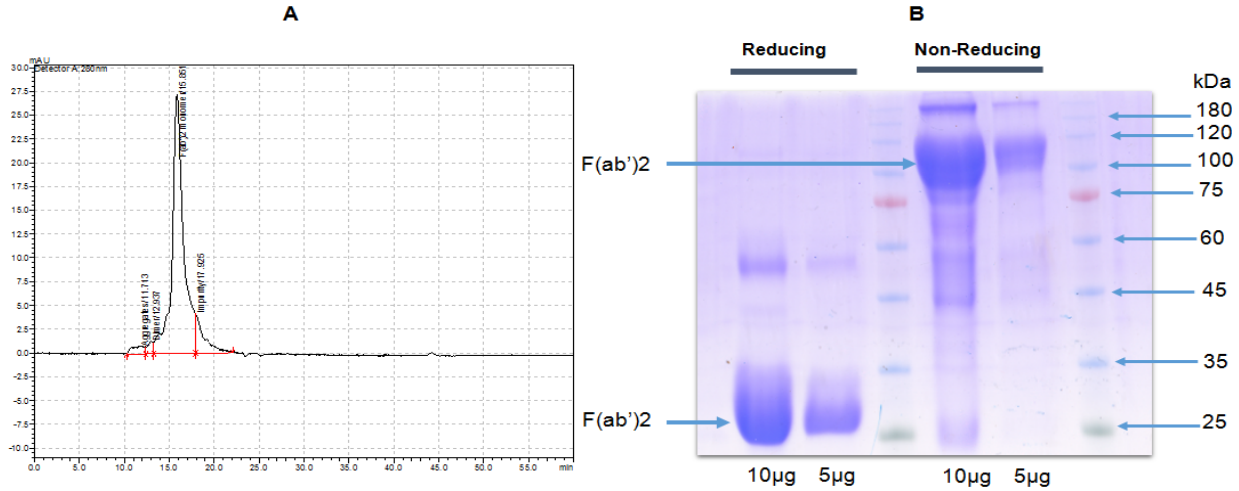

551  
552 **Fig.5.** Characterization of purified F(ab')<sub>2</sub>. A) HPLC chromatogram shows a dominant F(ab')<sub>2</sub>  
553 peak B) SDS-PAGE image of purified F(ab')<sub>2</sub> under reducing and non-reducing conditions. The  
554 purified F(ab')<sub>2</sub> were loaded (5 or 10 µg) with and without beta-mercaptoethanol in SDS-  
555 polyacrylamide gel and resolved under constant voltage. Reducing and non-reducing conditions  
556 were achieved with and without beta-mercaptoethanol respectively. The result shows F(ab')<sub>2</sub>  
557 fragment of 28 kDa (two heavy chains and two light chains of almost similar molecular weight)  
558 under reducing condition (left) and >110 kDa under non-reducing condition (right) demonstrating  
559 the purity of F(ab')<sub>2</sub> preparation.

560

561

562

563

564

565

566

567

568

569 **Figure 6**

570

571

572

573

574

575

576

577

578

579

580

581

582

583

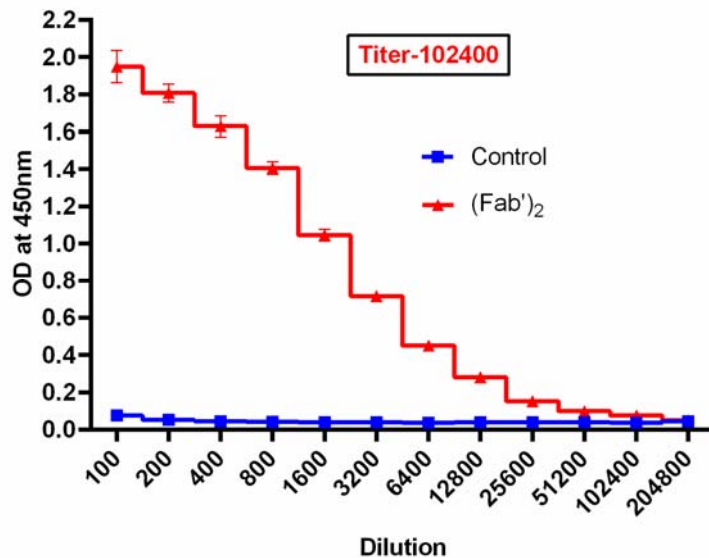

584 **Fig.6.** Antibody titration of the F(ab')<sub>2</sub> purified from the pooled plasma of immunized equine with

585 respect to pooled sample of negative control and titer is given in inset box. F(ab')<sub>2</sub> titer was

586 measured by direct ELISA method in which the whole virus antigen (approximately 1×10<sup>5</sup> virus

587 particles) coated-plates were incubated with serially diluted F(ab')<sub>2</sub> (1:100 to 1:204800 dilution)

588 for 2 hours at RT. HRP conjugated anti-F(ab')<sub>2</sub> secondary antibody (1:5000 dilution) were added

589 subsequently and the color reaction was developed by adding TMB substrate. F(ab')<sub>2</sub> titer was

590 calculated by the reciprocal value of highest dilution at which absorbance value is ≥ twice the

591 value of negative control in the same dilution series.

592

593 **Figure 7**

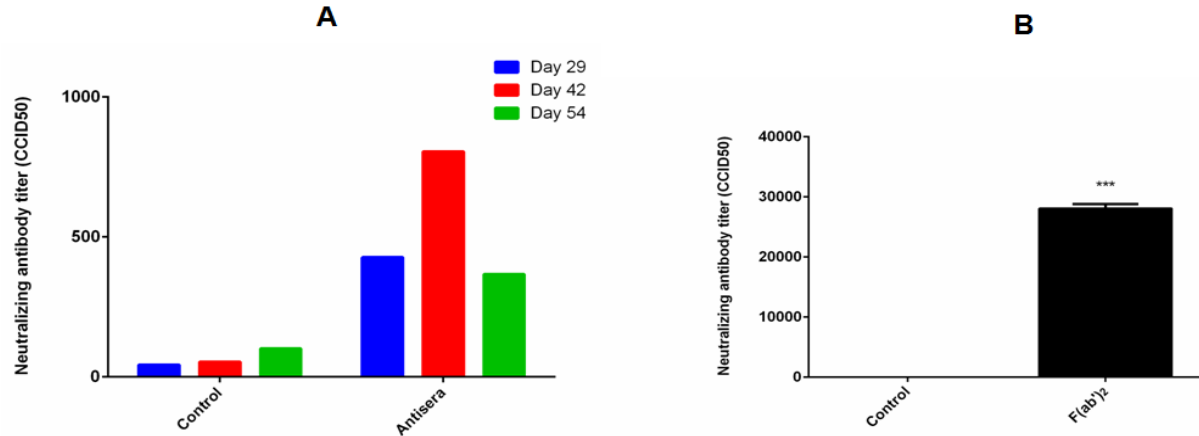

594

595

596 **Fig.7.** Neutralization capacities of host antisera and purified F(ab')<sub>2</sub>. (A) Neutralization of  
597 SARS-CoV-2 by pooled of antisera. Neutralization capacities of antisera drawn from horses 29,  
598 42 and 54 days post-immunization were tested by micro neutralization assays. CCID50 of the  
599 antisera treated virus particles are represented. (B) Neutralization capacities of F(ab')<sub>2</sub>  
600 generated from pooled antisera. Micro neutralization assays were performed similarly as in  
601 Figure 6 and the data are represented as CCID50

602

603

604

605

606



607 **Supplementary Figure 1**

608

609

610

611

612

613

614

615

616

617

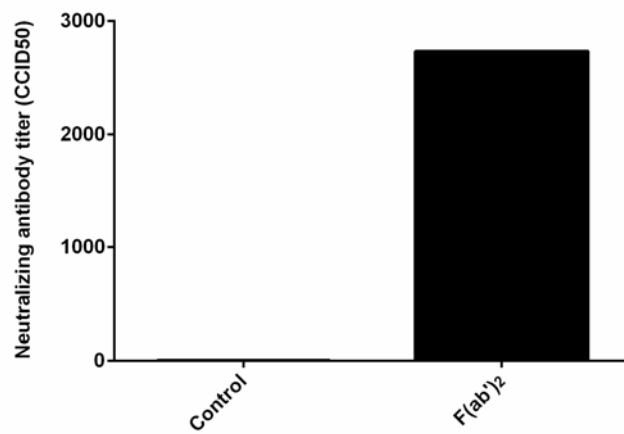

618 **Fig.S1.** Neutralization capacities of F(ab)<sub>2</sub> generated from batch of pooled antisera. Micro

619 neutralization assays were performed similarly as in Figure 6 and the data are represented as

620 CCID50. The antisera were developed against CCMB-O2 isolate and neutralization was tested

621 against CCMB-L-1021.

622
